# Supplementary material for: Development of Novel Ecto-Nucleotide Pyrophosphatase/Phosphodiesterase 1 (ENPP1) Inhibitors for Tumor Immunotherapy
Source: MDPI journal article supplement (doi:10.3390/ijms23137104), 2022-06-26
Supplement: s1 [file s1]

# **Development of Novel Ecto-Nucleotide Pyrophosphatase/ Phosphodiesterase 1 (ENPP1) Inhibitors for Tumor Immunotherapy**

Xiang Wang, Xing Lu, Daojing Yan , Yajun Zhou and Xiangshi Tan\*  
Department of Chemistry, Fudan University, Shanghai 200433, China

\* Corresponding authors.

E-mail addresses: xstan@fudan.edu.cn

## **Table of contents**

|                                      |    |
|--------------------------------------|----|
| Fig S1 .....                         | 2  |
| NMR spectrum and HMRS spectrum. .... | 3  |
| Gene sequence. ....                  | 11 |
| Peptide sequence .....               | 13 |

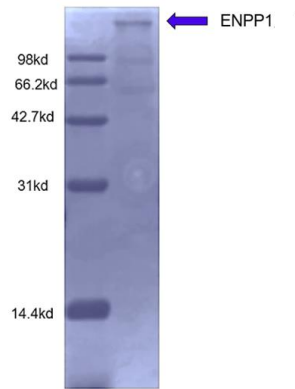

**Fig. S1 The quality of protein purification was validated by SDS-PAGE analysis**

# NMR spectrum and HMRS spectrum

4a

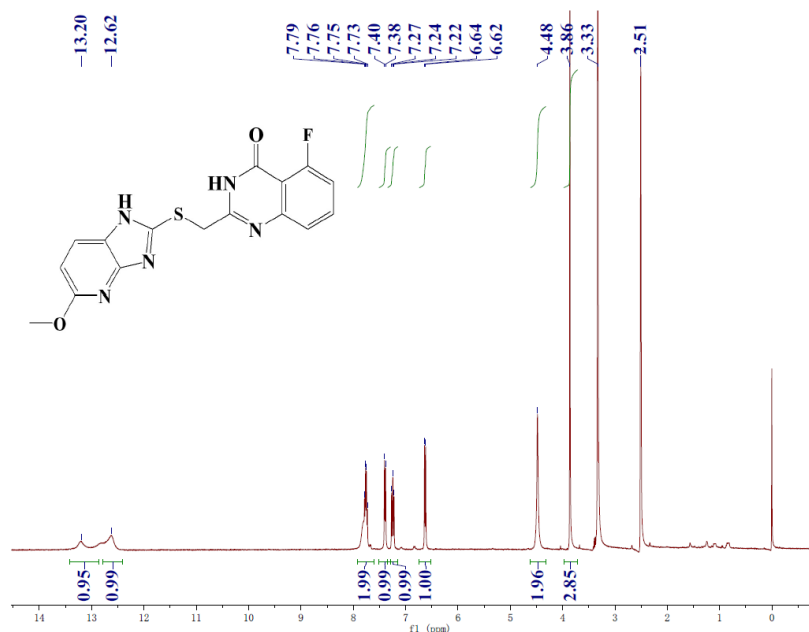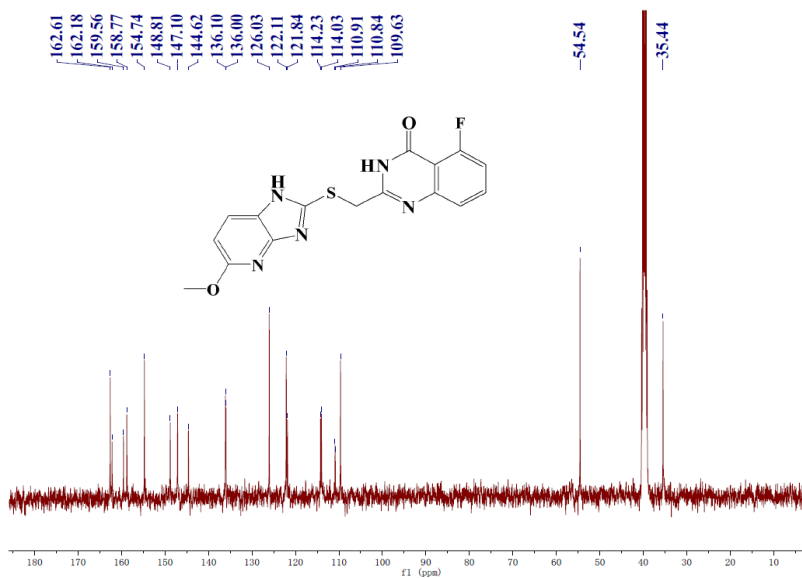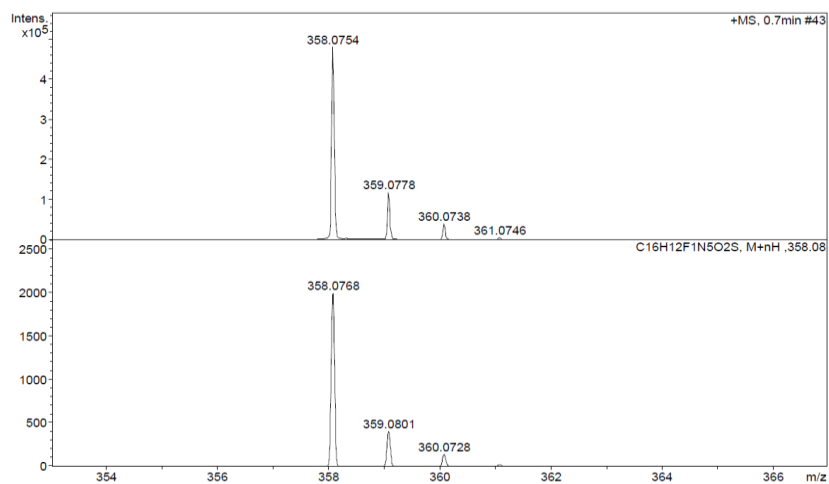

4b

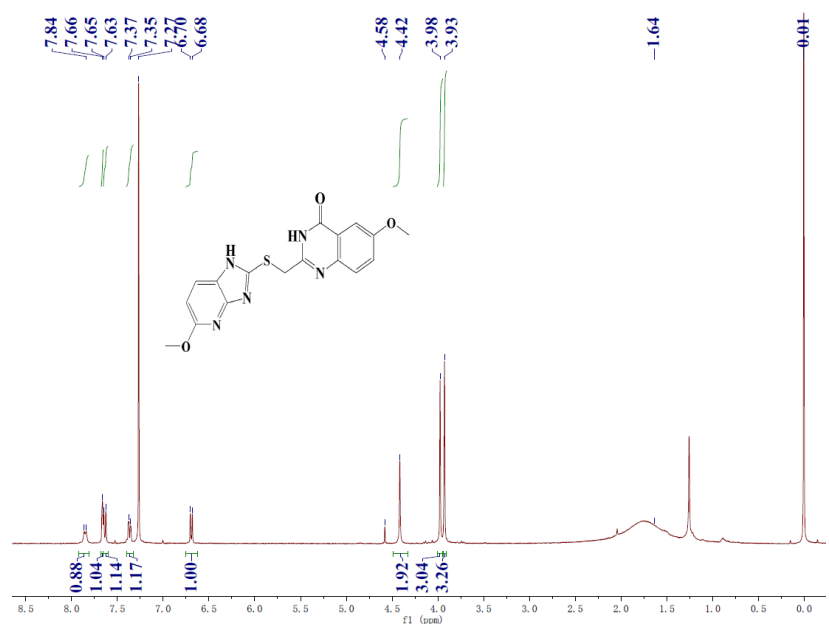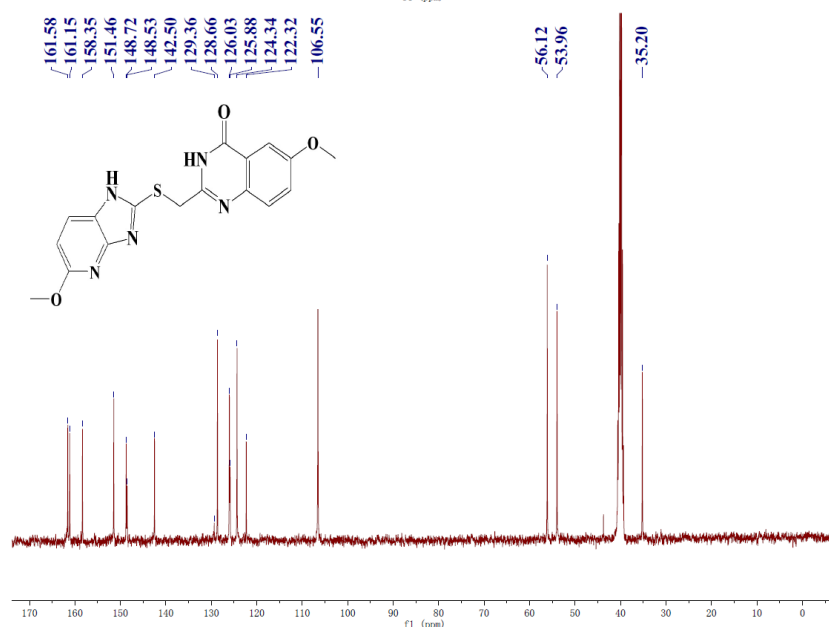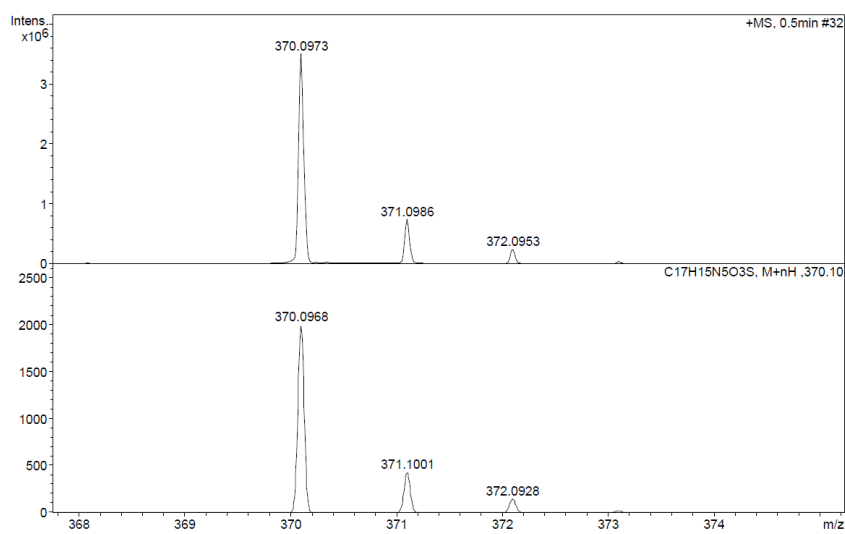

4c

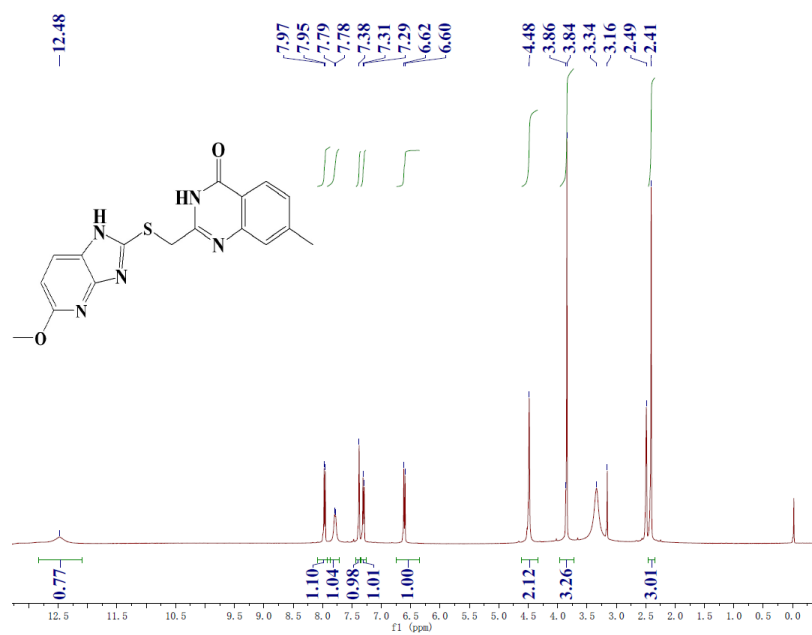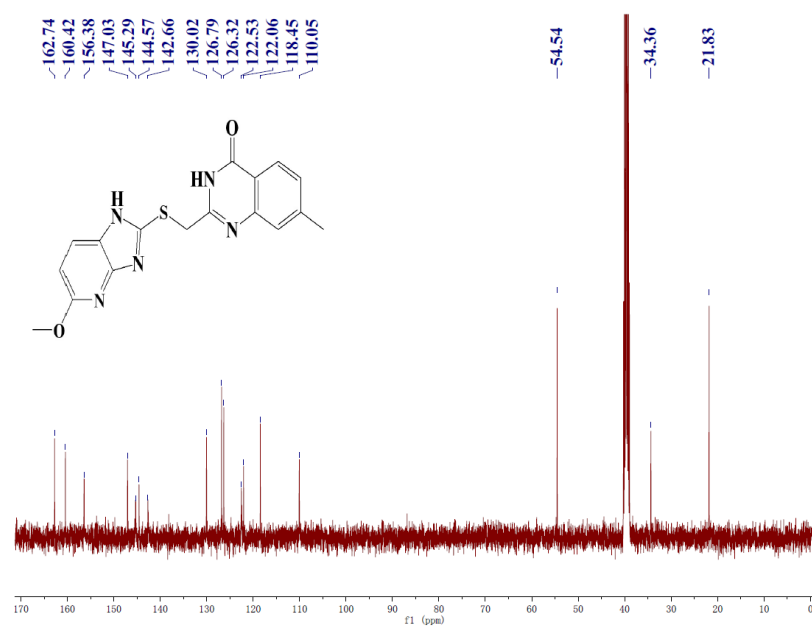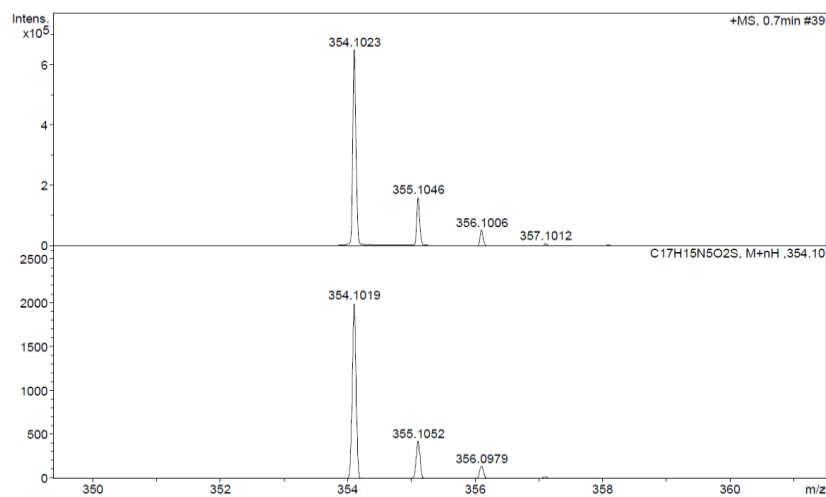

4d

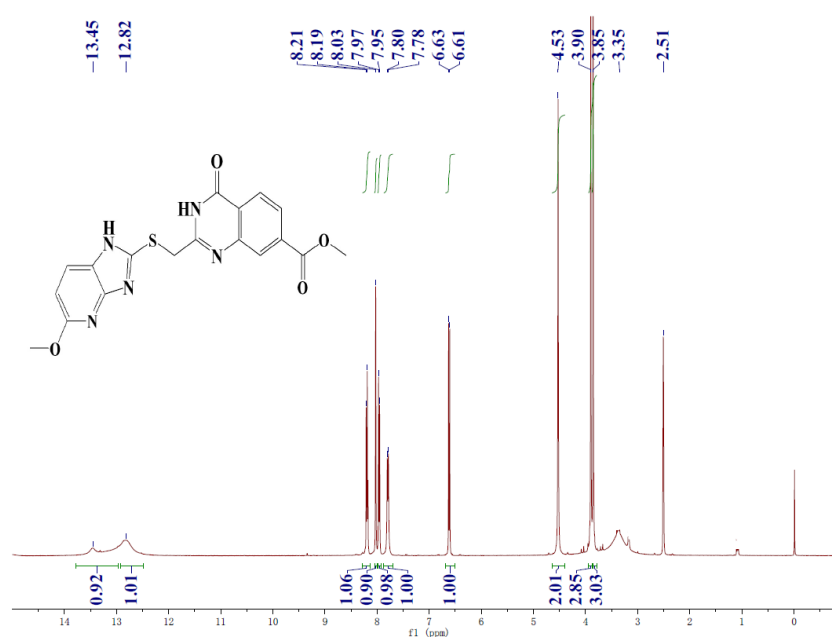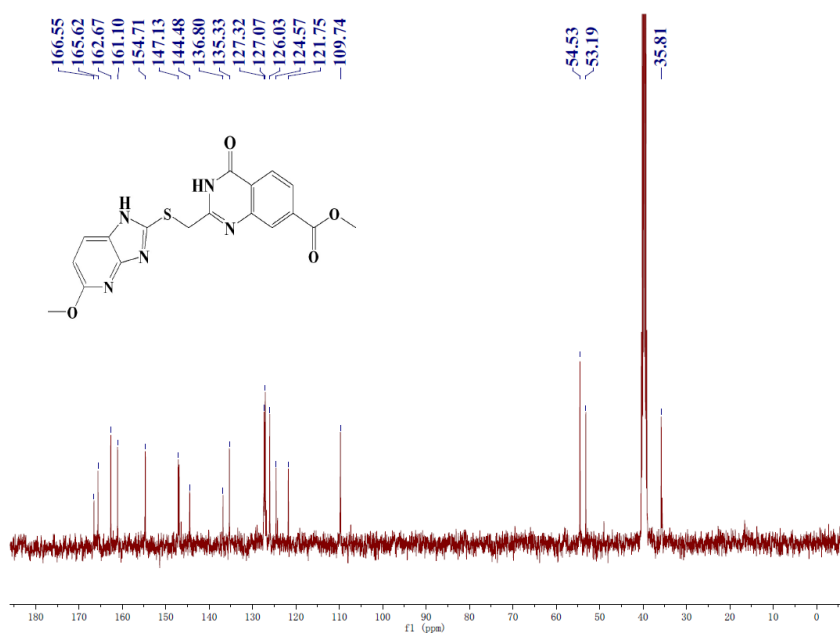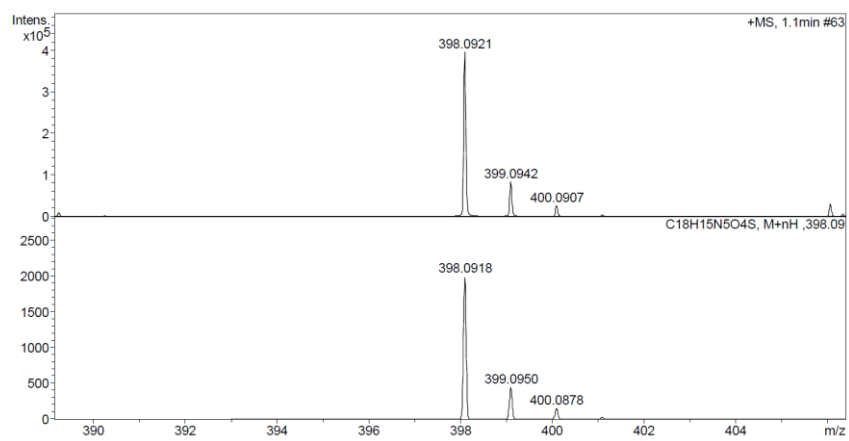

4e

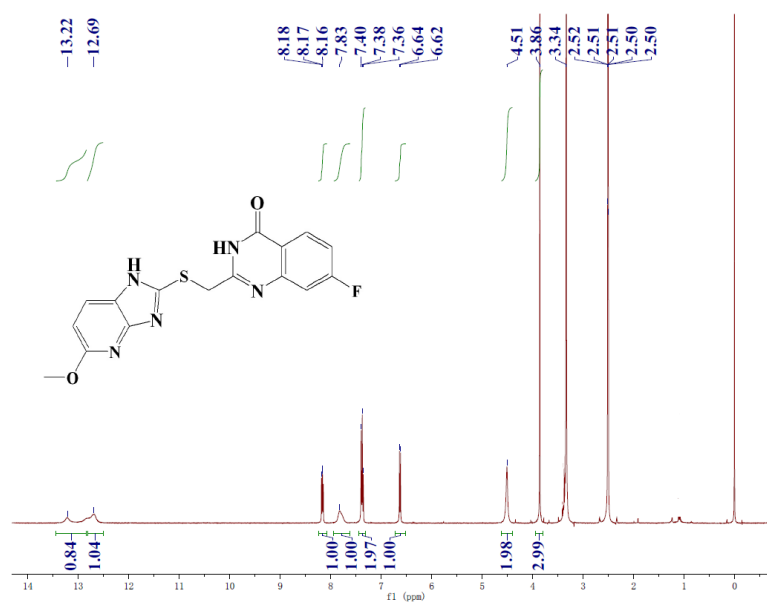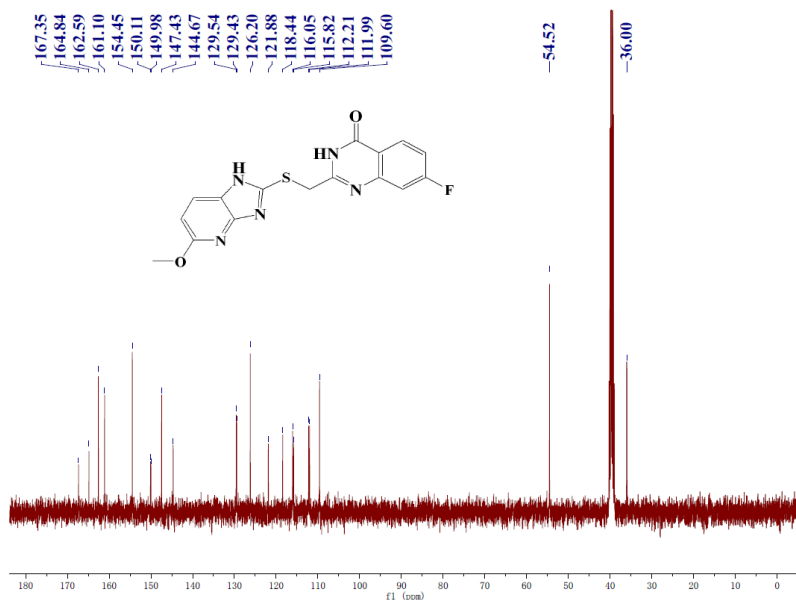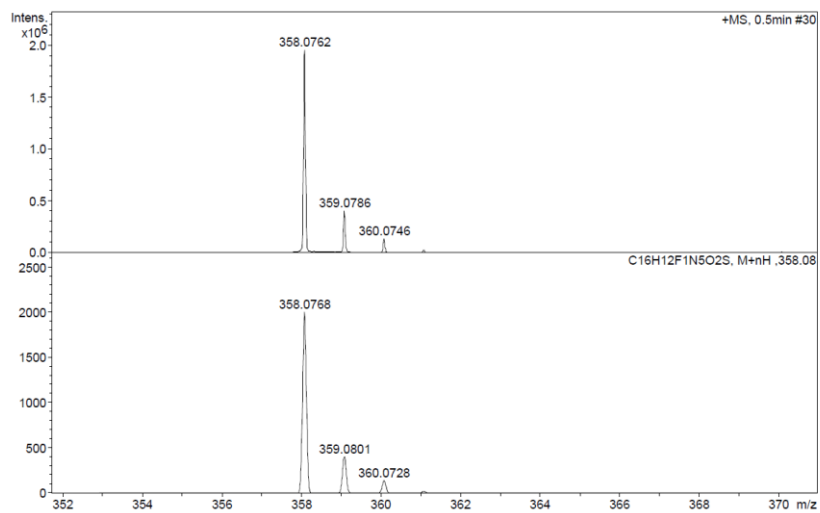

4f

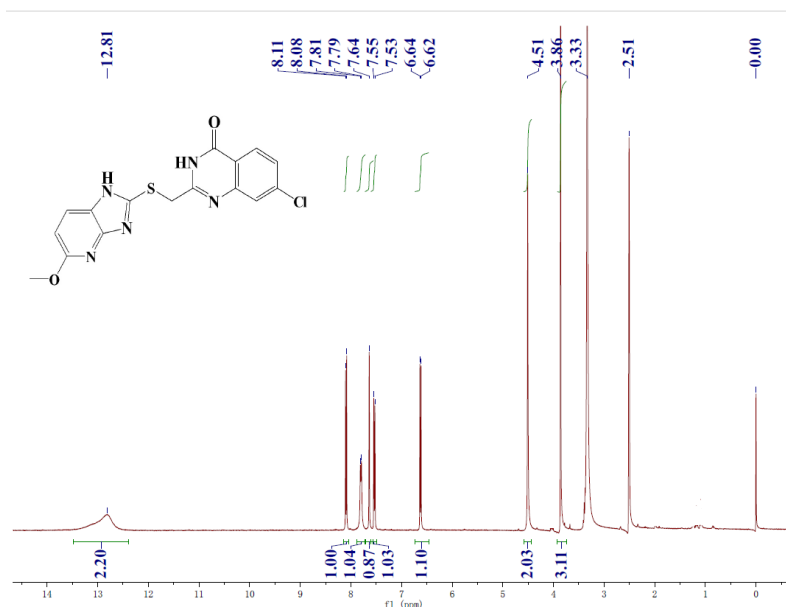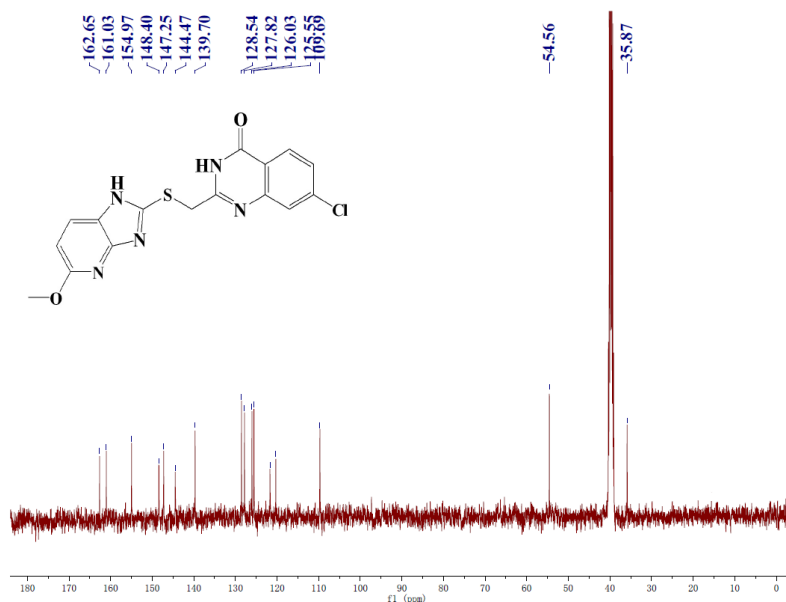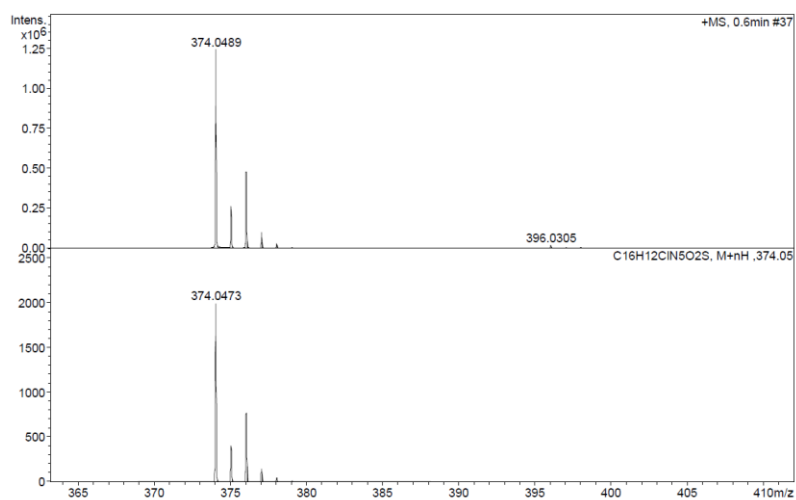



4g

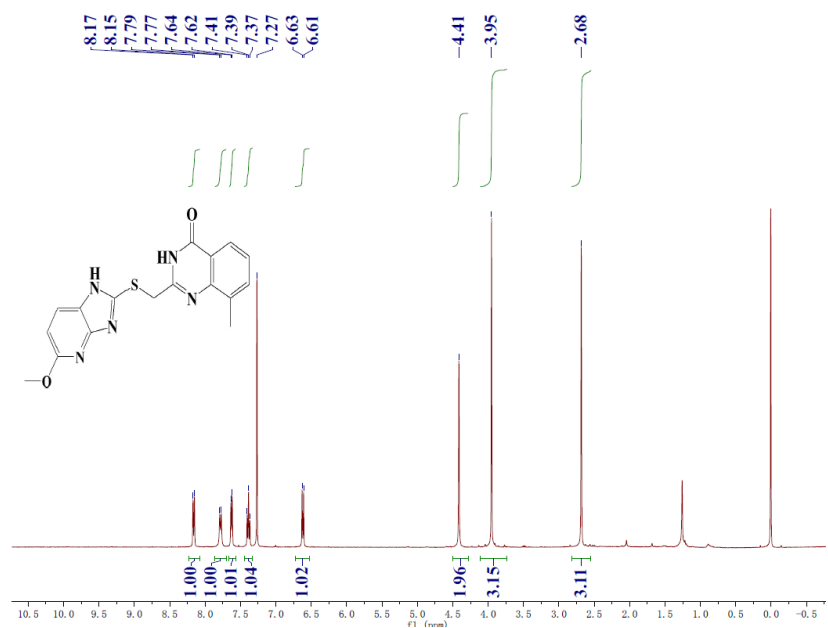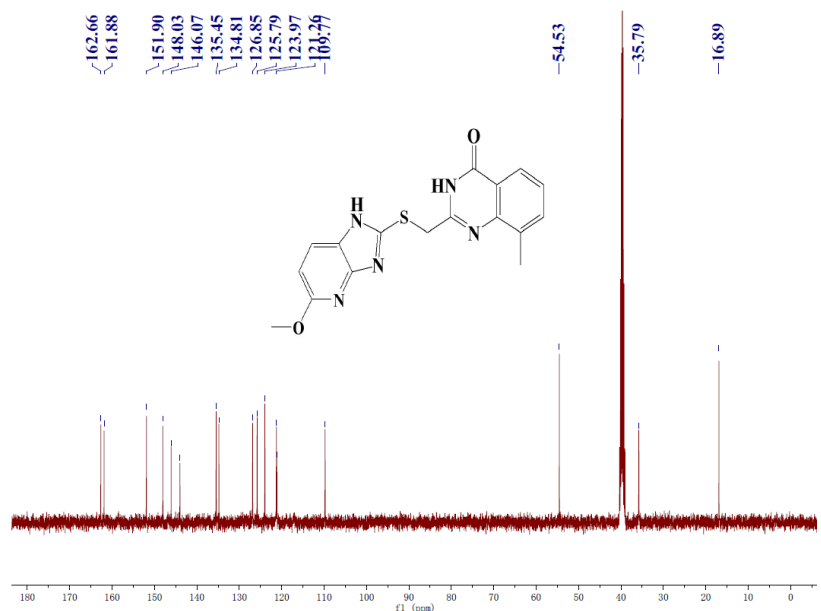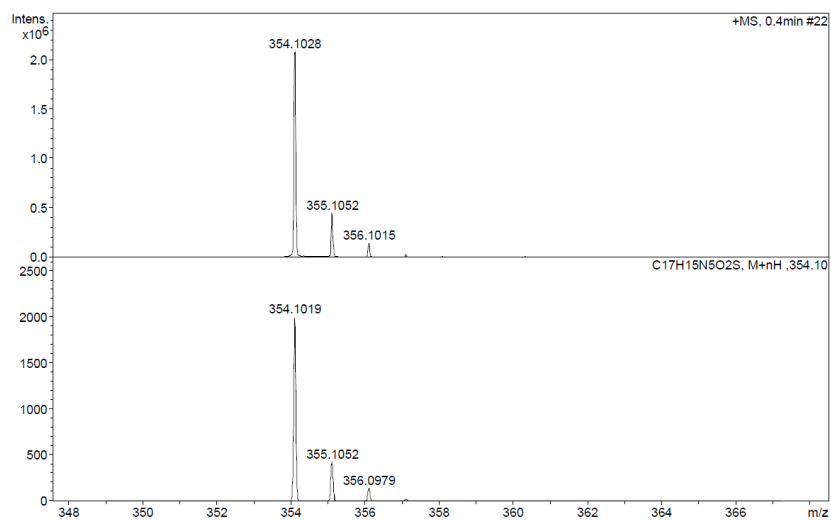

4h

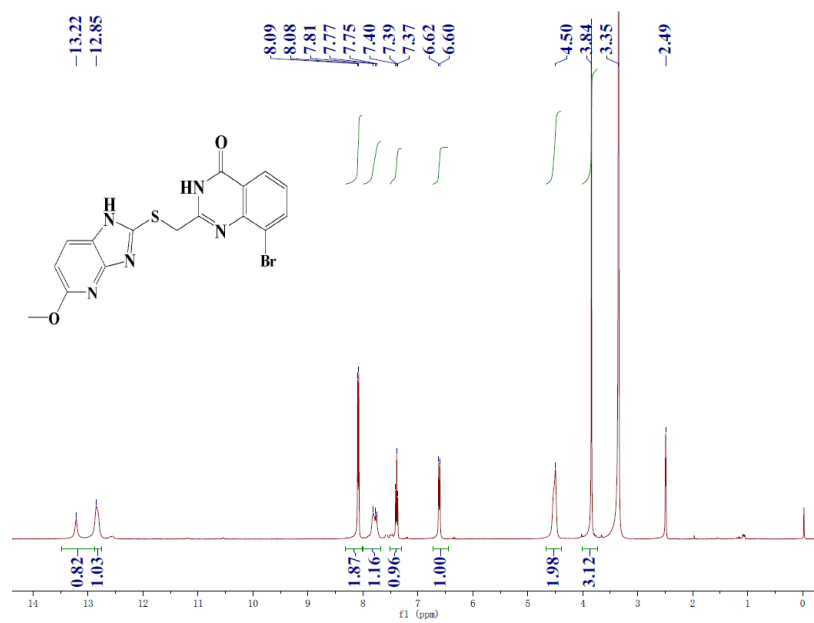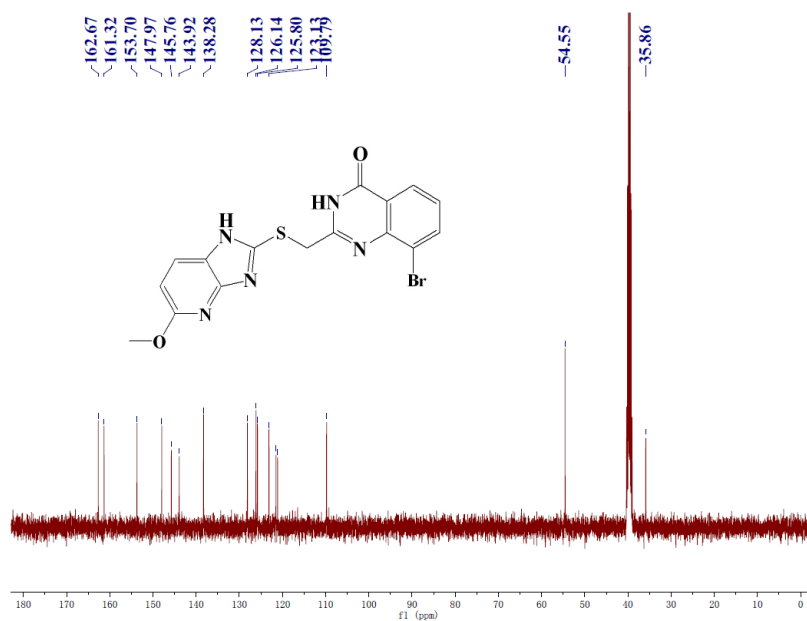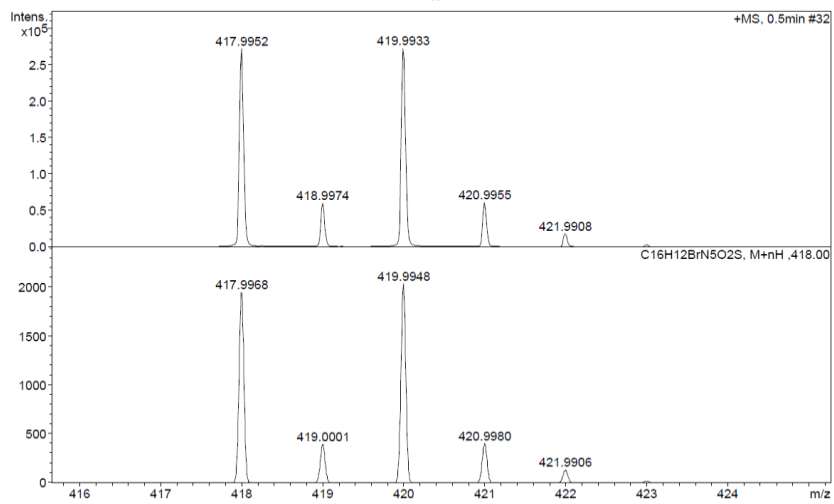

**Gene sequence: (2582 bp)**

GAATTCGCCGCCACCATGGGCGTGCTGCTGACACAGAGGACACTGCTGT  
CCCTGGTGCTGGCCCTGCTGTTCCCTAGCATGGCCTCCATGGGCAGGTGTT  
TTGAGAGGACATTTGGCAACTGCAGATGTGATGCCGCCTGCGTGGAGCTG  
GGCAATTGTTGCCTGGACTACCAGGAGACCTGCATCGAGCCTGAGCACATC  
TGGACCTGCAATAAGTTTAGGTGCGGCGAGAAGAGACTGACCAGGAGCCT  
GTGTGCCTGTTCCGACGACTGCAAGGATAAGGGCGACTGCTGCATCAACTA  
CAGCTCCGTGTGCCAGGGCGAGAAGAGCTGGGTGGAGGAGCCCTGCGAG  
TCCATCAATGAGCCCCAGTGCCCTGCCGGCTTCGAGACCCACCTACACTG  
CTGTTTTCCCTGGATGGCTTTAGAGCCGAGTACCTGCACACATGGGGCGGC  
CTGCTGCCTGTGATCTCCAAGCTGAAGAAGTGTGGCACCTACACCAAGAA  
CATGAGACCCGTGTACCCTACCAAGACATTTCCCTAATCACTACTCCATCGTG  
ACAGGCCTGTACCCTGAGAGCCACGGCATCATCGATAATAAGATGTACGAT  
CCTAAGATGAACGCCTCCTTCTCCCTGAAGTCCAAGGAGAAGTTCAACCCT  
GAGTGGTACAAGGGCGAGCCCATCTGGGTGACAGCCAAGTACCAGGGCCT  
GAAGTCCGGCACCTTTTTCTGGCCTGGCAGCGACGTGGAGATCAACGGCA  
TCTTTCCTGATATCTACAAGATGTACAACGGCAGCGTGCCCTTCGAGGAGA  
GGATCTTGCCCGTGCTGCAGTGGCTGCAGCTGCCCAAGGACGAGAGGCCT  
CACTTCTACACCCTGTACCTGGAGGAGCCTGACTCCTCCGGCCACAGCTAC  
GGCCCCGTGAGCAGCGAGGTCATTAAGGCCCTGCAGAGGGTGGACGGCAT  
GGTGGGCATGCTGATGGACGGCCTGAAGGAGCTGAATCTGCACAGATGTC  
TGAATCTGATCCTGATCTCCGACCACGGCATGGAGCAGGGCAGCTGCAAG  
AAGTACATCTACCTGAACAAGTACCTGGGCGATGTGAAGAATATCAAGGTC  
ATCTATGGCCCCGCCGCCAGGCTGAGACCCAGCGACGTTCCCGATAAGTAC  
TACTCCTTCAACTACGAGGGCATCGCCAGGAATCTGTCCTGTAGAGAGCCT  
AACCAGCACTTTAAGCCCTACCTGAAGCACTTCCTGCCTAAGAGGCTGCAC  
TTTGCCAAGAGCGATAGAATCGAGCCTCTGACCTTTTACCTGGACCCCCAG  
TGGCAGCTGGCCCTGAATCCTAGCGAGAGGAAGTACTGTGGCTCCGGCTTT  
CACGGCTCCGATAACGTGTTCTCCAACATGCAGGCCCTGTTCGTGGGCTAC  
GGCCCCGGATTCAAACACGGCATCGAGGCCGATACATTGAGAATATCGAG  
GTGTACAACCTGATGTGTGATCTGCTGAACCTGACCCCCGCCCTAACAAT  
GGCACCACAGGCTCCCTGAACCACCTGCTGAAGAATCCTGTGTACACCCT  
AAGCACCCCAAGGAGGTGCACCCTCTGGTGCAGTGCCCTTTTACAAGAAA  
TCCCAGGGATAATCTGGGCTGCAGCTGTAACCCTAGCATCCTGCCTATCGAG

GACTTTCAGACCCAGTTTAATCTGACAGTGGCCGAGGAGAAGATCATCAAG  
CACGAGACCCTGCCTTACGGCAGACCTAGGGTGCTGCAGAAGGAGAACAC  
CATCTGCCTGCTGTCCCAGCACCAAGTTCATGTCCGGCTACTCCCAGGACAT  
CCTGATGCCTCTGTGGACAAGCTACACAGTGGACAGAAACGATTCCTTTAG  
CACCGAGGACTTTAGCAATTGTCTGTACCAGGATTTTAGAATCCCCCTGAG  
CCCCGTGCACAAGTGCTCCTTTTACAAGAATAATACCAAGGTGTCCTACGG  
CTTCCTGAGCCCCCCCCCAGCTGAACAAGAACTCCTCCGGCATCTACAGCGA  
GGCCCTGCTGACAACCAATATCGTGCCTATGTACCAGTCCTTCCAGGTCATT  
TGGAGGTACTTCCACGATACCCTGCTGAGGAAGTACGCCGAGGAGAGAAA  
TGGCGTGAACGTGGTGAGCGGCCCTGTGTTTGACTTCGATTACGATGGCAG  
GTGTGATAGCCTGGAGAACCTGAGACAGAAGAGAAGGGTCATTAGGAACC  
AGGAGATCCTGATCCCCACCCACTTCTTTATCGTGCTGACAAGCTGCAAGG  
ATACCTCCCAGACACCTCTGCACTGCGAGAACCTGGATACCCTGGCCTTTAT  
CCTGCCCCACAGGACCGACAATTCCGAGAGCTGTGTGCACGGCAAGCACG  
ACTCCTCCTGGGTGGAGGAACTGCTGATGCTGCACAGAGCCAGAATCACA  
GACGTGGAGCACATCACAGGCCTGTCCTTCTACCAGCAGAGGAAGGAGCC  
TGTGTCCGATATCCTGAAGCTGAAGACACACCTGCCTACATTCAGCCAGGA  
GGACGGCGGCAGCCACCACCACCACCATCACCACCACCTAATAGGATCC

**Peptide sequence: (852 aa)**

MGVLLTQRTL LSLVLALLFPSMASMGRCFERTFGNCRCDAAACVELGNCCL  
DYQETCIEPEHIWTCNKFRCGEKRLTRSLCACSDDCCKDKGDCCINYSSVCQGE  
KSWVEEPCESINEPQCPAGFETPPTLLFSLDGFRAEYLHTWGGLLPVISKLKKC  
GTYTKNMRPVYPTKTFPNHYSIVTGLYPESHGIIDNKMYDPKMNASFSLKSKE  
KFNPEWYKGEPIWVTAKYQGLKSGTFFWPGSDVEINGIFPDIYKMYNGSVPF  
ERILAVLQWLQLPKDERPHFYTLYLEEPDSSGHSYGPVSSEVIKALQRVDGMV  
GMLMDGLKELNLHRCLNLILSDHGMEQGSCCKYIYLNKYLGDVKNIKVIYG  
PAARLRPSDVPDKYYSFNYEGIARNLSCREPNQHFKPYLKHFLPKRLHFAKSD  
RIEPLTFYLDPQWQLALNPSEKRYCGSGFHGSDNVFSNMQALFVGYGPGFKH  
GIEADTFENIEVYNLMCDLLNLTAPNNGTHGSLNHLLKNPVYTPKHPKEVHP  
LVQCPFTRNPRDNLGCSCNPSILPIEDFQTQFNLTVAEEKIIKHETLPYGRPRVL  
QKENTICLLSQHQFMSGYSQDILMPLWTSYTVDRNDSFSTEDFSNCLYQDFRIP  
LSPVHKCSFYKNNTKVSYGFLSPPQLNKNSSGIYSEALLTTNIVPMYQSFQVIW  
RYFHDTLLRKYAEERNGVNVVSGPVDFDFDYDGRCDSLENLRQKRRVIRNQEI  
LIPTHFFIVLTSCKDTSQTPLHCENLDTLAFILPHRTDNSESCVHGKHDSSWVE  
ELLMLHRARITDVEHITGLSFYQQRKEPVSDILKLKTHLPTFSQEDGGSHHHH  
HHHH
